# Supplementary material for: A new species of Metopocetus (Cetacea, Mysticeti, Cetotheriidae) from the Late Miocene of the Netherlands
Source: PeerJ. 2016 Jan 28;4:e1572. doi: 10.7717/peerj.1572 (PMC4734074; doi:10.7717/peerj.1572)
Supplement: Table S1 — Occurrences of marine and terrestrial palynomorphs in the matrix sample taken from the skull. [file peerj-04-1572-s001.xlsx]

## Sheet: Blad1
Dinoflagellate cysts
Batiacasphaera hirsuta	1
Barssidinium graminosum	2
Barssidinium taxandrianum	2
Barssidinium spp.	1
Bitectatodinium serratum	1
Cribroperidinium tenuitabulatum	1
Dapsillidinium pseudocolligerum	1
Echinidinium euaxum	6
Gramocysta verricula	2
Habibacysta tectata	5
Invertocysta lacrimosa	2
Heteraulacacysta campanula	18
Hystrichosphaeropsis obscura	5
Lejeunecysta sp. ind	1
Labyrinthodinium truncatum	2
Lingulodinium machaerophorum	15
Melitasphaeridium choanophorum	2
Operculodinium centrocarpum	47
Polysphaeridium zoharyi	1
Quinquecuspis concreta	2
Spiniferites spp.	45
Tectatodinium pellitum	1
Tuberculodinium vancampoae	2
Total	165
Acritarchs
Cyclopsiella elliptica/granosa	3
Paralecaniella indentata	1
Small spiny acritarch	1
Total	5
Terrestrial palynomorphs
Tsuga	5
Pollen - bisaccate	260
Spores	4
Total	269
